# Supplementary material for: Culture and Social Norms: Development and Application of a Model for Culturally Contextualized Communication Measurement (MC3M)
Source: Frontiers journal article supplement (doi:10.3389/fcomm.2021.770513), 2022-01-03
Supplement: Table_1.pdf [file Table_1.pdf]

## Appendix A

The map of Yushu Prefecture (Plateau Perspectives, 2019); Household survey data were collected from four counties, including Zaduo, Nangqian, Yushu, and Chengduo.

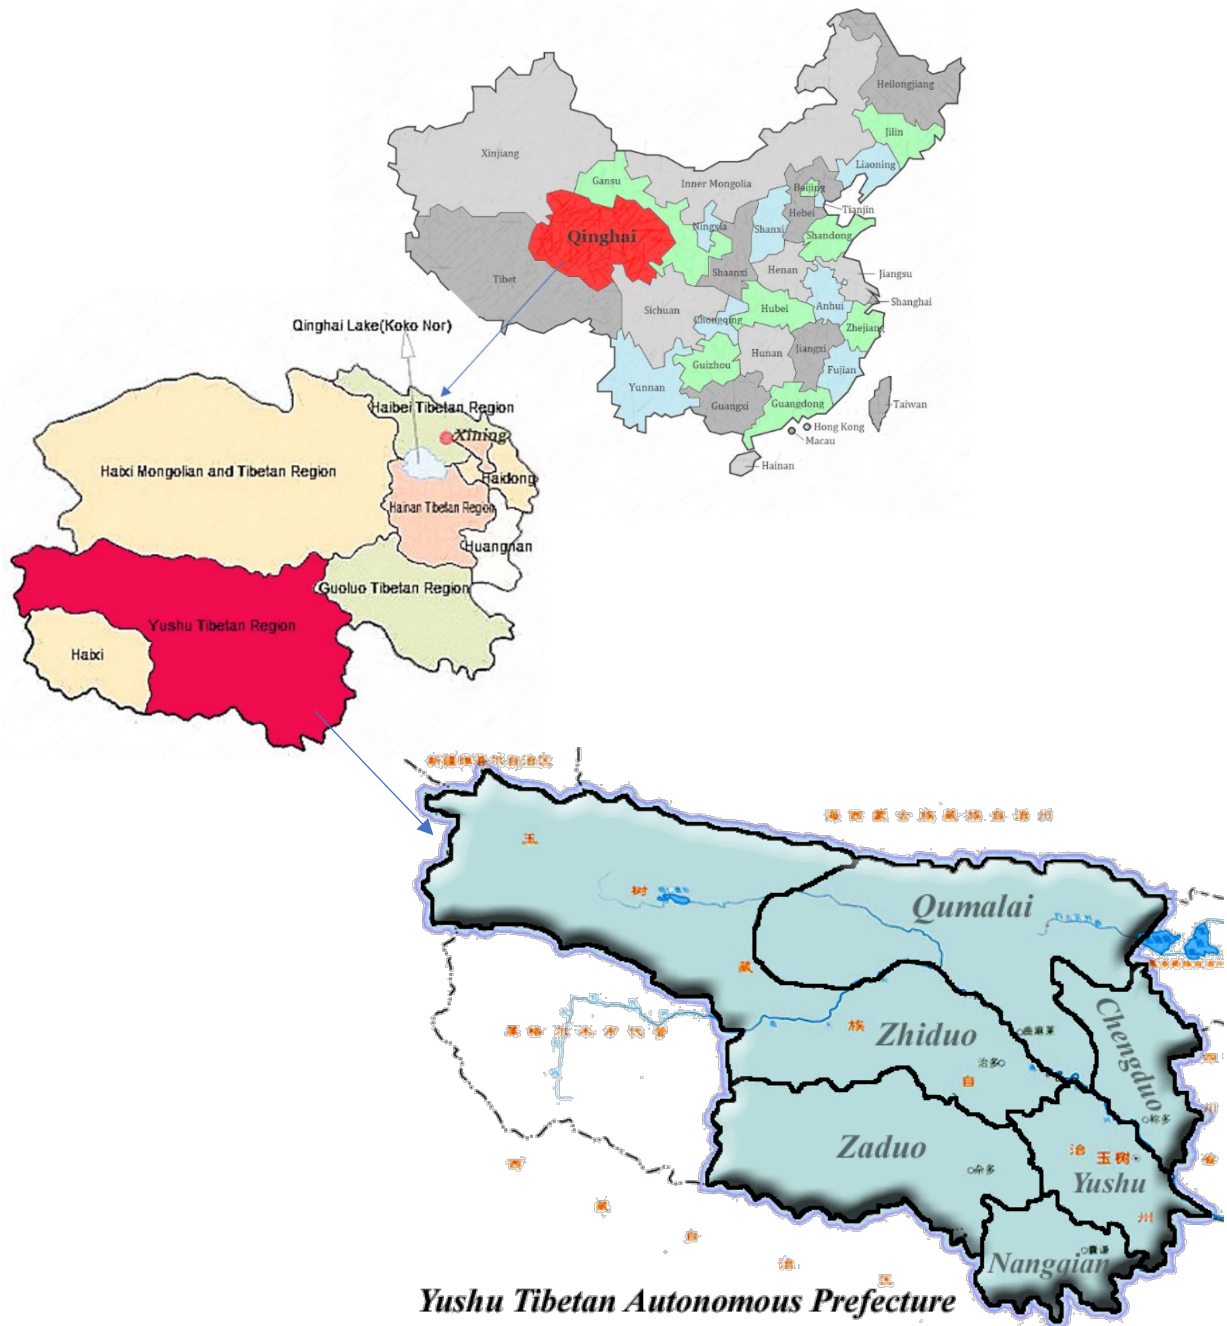

## Appendix B

### Survey Items Translation and Back-Translation Procedures

We followed a series of rigorous procedures in conducting the translation and back-translation as described below, intending to minimize the inequivalent information and /or information loss during this process.

1. The research team has consisted of members who are native in English, Mandarin Chinese, and Kham Tibetan dialect. Two researchers are bilingual in English and Chinese; one researcher who was originally from our target study population is trilingual in English (fluent), Mandarin Chinese, and Kham Tibetan dialect (native). This particular researcher not only served as the cultural insider during the whole process of us developing and translating the measures, but had conducted research in our study area among this unique co-cultural group for more than a decade time as part of the NGO conservation group we collaborated in this project.
2. As described in the manuscript, all the measures were developed in English and Tibetan simultaneously, captured in English, due to the reason that 1) the original theoretical framework and measures were all in English, and 2) two of the leading researchers on the team only speak English. Notably, the measures were culturally derived from the very beginning of this process to reflect the cultural and social environment accurately based on our first phase of the interviews and the other existing work conducted by our collaborators.

For example, most social norm measures used the phrase “people around me” or “people whose opinions I value” as the referent group in the scale items. In our case, based on the initial research and existing work in that area conducted by our collaborators, we had noticed the importance of one’s herding group and others living in the same village to our target study population. As such, these two groups were used in our social norm measures as the referent groups, instead of using the conventional phrases directly, which would have been culturally inappropriate and invalid.

In short, most of the cultural equivalence issues were identified and resolved during the process of measurement development, despite that they were captured in English initially.

3. The developed English measures were then sent to a certified professional translator who is native in Kham Tibetan dialect and fluent in English (passed the National College English Test, CET in China; Ying Zheng & Liying Cheng, 2008) to translate the items into Kham Tibetan. Later on, another certified professional translator with the exact same qualifications received the translated Kham Tibetan measures and back-translated them into English.
4. After we received the back-translated items, the team members who were involved in the development of the English version of the survey and are native English speakers

## CULTURALLY CONTEXTUALIZED COMMUNICATION MEASUREMENT

checked all the back-translated content to ensure the consistency of the items between the original English survey items and the back-translated items.

We purposefully hired professional translators who were native in our study group and independent from the research team, to ensure the objectivity of their translation and back-translation, as well as to benefit from their perspectives as cultural insiders.

5. Once we identified the inconsistencies between the original and the back-translated survey, all team members met together, discussed the potential issues identified, and made the decision to change the original survey items or not.

For example, one term we used in the original survey items was “eco-compensation payment.” However, the translated and back-translated items did not reflect the exact term we intended to include initially. After discussing this with the cultural insiders and talking to some people from our study population, we learned that most people just call it the “land fee” or the “land compensation” instead of the official term. As such, we eventually decided to modify the term in the original survey.

This process iterated several rounds until we found no discrepancies in the two files and finalized the survey to be tested in the cognitive interviews. Flexibility across the original and the translated survey was allowed for local variations in the dialect.

Ying Zheng & Liying Cheng. (2008). Test review: College English Test (CET) in China. *Language Testing*, 25(3), 408–417. <https://doi.org/10.1177/0265532208092433>

# CULTURALLY CONTEXTUALIZED COMMUNICATION MEASUREMENT

## Appendix C

### *Missing Data and Not-Sure Answers for Each Survey Item*

| Scale Items | All Sample ( $N = 360$ ) |               | HG ( $n = 71$ ) |               | VG ( $n = 289$ ) |               |
|-------------|--------------------------|---------------|-----------------|---------------|------------------|---------------|
|             | NS                       | Truly Missing | NS              | Truly Missing | NS               | Truly Missing |
| PDN1        | 15                       | 1             | 1               |               | 14               | 1             |
| PDN2        | 15                       | 1             |                 |               | 15               | 1             |
| PDN3        | 19                       | 1             |                 |               | 19               | 1             |
| PDN4        | NA                       | NA            | NA              | NA            | NA               | NA            |
| PIN1        | 65                       | 3             | 5               | 3             | 60               |               |
| PIN2        | 65                       |               | 8               |               | 57               |               |
| PIN3        | 43                       | 2             | 3               |               | 40               | 2             |
| PIN4        | 63                       | 1             | 6               | 1             | 57               |               |
| GID1        | 32                       | 1             | 3               |               | 29               | 1             |
| GID2        | 23                       | 1             | 1               |               | 22               | 1             |
| GID3        | 54                       | 1             | 5               |               | 49               | 1             |
| GID4        | 1                        |               |                 |               | 1                |               |
| GO1         | 14                       |               | 1               |               | 13               |               |
| GO2         | 21                       | 1             | 1               |               | 20               | 1             |
| GO3         | 8                        | 2             |                 |               | 8                | 2             |
| GO4         | 1                        | 4             | 1               |               |                  | 4             |
| OE1         | 2                        | 1             |                 |               | 2                | 1             |
| OE2         |                          | 1             |                 |               |                  | 1             |
| OE3         | 15                       |               |                 |               | 15               |               |
| OE4         | 42                       |               |                 |               | 42               |               |
| BI1         | 20                       |               | 1               |               | 19               |               |
| BI2         | 38                       | 4             | 1               |               | 37               | 4             |
| BI3         | 40                       | 2             | 1               |               | 39               | 2             |

## CULTURALLY CONTEXTUALIZED COMMUNICATION MEASUREMENT

*Note:* PDN = Perceived descriptive norms, PIN = Perceived injunctive norms, GID = Group identity, GO = Group orientation, OE = Outcome Expectation, BI = Behavioral intentions; HG = Herding group, VG = Village Group; NA = Not applicable; NS = Not sure.

Notably, the number of NS answers ( $n = 596$ ) across the entire data set is substantially larger than the missing data ( $n = 27$ ) across the 22 items, showing that people either had limited information regarding certain questions (i.e., uncertainty truly existed) or felt uncomfortable providing a definitive answer, possibly as a function of their cultural background and preferences (Hui & Triandis, 1989; Johnson, 1981). When splitting the sample based on the referent groups, it clearly shows that village group participants (80.28% of the total sample) responded with many more NS answers ( $n = 558$ , accounting for 93.62% of the total NS answers) compared to those belonging to a herding-group (19.72% of the total sample;  $n = 38$ , accounting for 6.38% of the total NS answers), after taking the sample difference into account. These findings suggest a systematic difference in terms of the prevalence of NS answers between the herding group and village group participants. The number of NS responses also serves as a caveat in the study findings and were discussed in the main text.

# CULTURALLY CONTEXTUALIZED COMMUNICATION MEASUREMENT

## Appendix D

### Survey Items in English

Survey number \_\_\_\_\_ Interviewer ID # \_\_\_\_\_ Assistant ID # \_\_\_\_\_

Date of survey (Year-month-date) \_\_\_\_\_ Location \_\_\_\_\_ Event \_\_\_\_\_

Survey starting time (hour-minute): \_\_\_\_\_ Survey ending time (hour-minute): \_\_\_\_\_

## I. Introduction

1. Gender of respondent (by observation) [circle the answer]

|        |   |
|--------|---|
| Male   | 1 |
| Female | 2 |

Self-introduction: I am working for Shanshui Conservation Center to conduct a survey about herding behavior in Yushu region, aimed at improving the ecosystems and potentially improving the livelihoods of local residents. We are very interested in hearing what you have to say about herding by asking you some questions. The survey will take approximately 30 minutes.

2. Are you a herder? [circle the answer]

|     |   |                       |
|-----|---|-----------------------|
| Yes | 1 | → go to next question |
| No  | 2 | → go to Q7            |

3. Does your household have more than 10 yaks? [circle the answer]

|     |   |                       |
|-----|---|-----------------------|
| Yes | 1 | → go to next question |
| No  | 2 | → go to Q7            |

4. Are you the head of your household? [circle the answer]

|     |   |                       |
|-----|---|-----------------------|
| Yes | 1 | → go to next question |
| No  | 2 | → go to Q7            |

5. Can I tell you a little more about our survey so that you can decide whether or not to participate? [circle the answer]

|     |   |                               |
|-----|---|-------------------------------|
| Yes | 1 | → implement Consent Procedure |
| No  | 2 | → go to Q7                    |

**[Implement the Consent Procedure]**

## CULTURALLY CONTEXTUALIZED COMMUNICATION MEASUREMENT

6. Are you willing to participate in the survey? [circle the answer]

[Interviewer Note: It is possible that a participant says “yes, I’d like to participate” but with the additional comment such as “However, I may not be able to answer some questions due to my limited knowledge.” In this case, circle “2” and proceed to Section II.]

|                                 |   |                    |
|---------------------------------|---|--------------------|
| Yes                             | 1 | → go to Section II |
| Yes but my knowledge is limited | 2 | → go to Section II |
| No                              | 3 | → go to Q7         |

7. OK, thank you. Before I leave, can I ask you a couple of simple questions?

- In which county do you live? \_\_\_\_\_
- How old are you?  
\_\_\_\_\_ years old
- Mark here if the respondent refused to answer a and b \_\_\_\_\_

[Then thank the respondent again and end the interview.]

## II. Grazing information

8. Are you part of a herding group with other households? [circle the answer]

|     |   |                                                                                                                                         |
|-----|---|-----------------------------------------------------------------------------------------------------------------------------------------|
| Yes | 1 | → Continue to (a)-(b), and then finish the entire Section III.i (questions 9-35). Then to Section IV. <b>DO NOT ASK SECTION III.ii.</b> |
| No  | 2 | → Go to section III and finish the entire section III.ii (questions 36-62), and then to Section IV. <b>DO NOT ASK SECTION III.i.</b>    |

- With how many other households do you share grazing land?  
\_\_\_\_\_ households (number of them)
- Are you the herding group leader? \_\_\_\_ Yes; \_\_\_\_ No (includes former leader).

### III. Questions about norms

#### III.i. Questions for all participants who are part of a herding group

I am going to read a number of statements some of which ask you about **people in your herding group**. We are asking you to think about **people in your herding group**, not others in your village. After each statement, I will ask you to what degree you agree or disagree with the statement. I will use my fingers to represent the agreement or disagreement, with a “1” representing “strongly agree”, and a “5” representing “strongly disagree.” We understand that you might have a lot to say about some of the questions but in the interest of your time please just give us the answers without explaining your answers. We also understand that many of these questions sound similar to each other but there are small differences among them so please listen carefully to what we are asking.

| Questions                                                                                                                                    | 1<br>(strongly agree) | 2<br>(agree) | 3<br>(neutral) | 4<br>(disagree) | 5<br>(strongly disagree) | NS<br>(not sure) |
|----------------------------------------------------------------------------------------------------------------------------------------------|-----------------------|--------------|----------------|-----------------|--------------------------|------------------|
| 9. I am worried about whether my grassland can support my herd, for example due to wild animals, pikas and bugs, black soil or winter storm. | 1                     | 2            | 3              | 4               | 5                        | NS               |
| 10. I always sell my yaks at places where the price is the highest.                                                                          | 1                     | 2            | 3              | 4               | 5                        | NS               |
| 11. Reducing the number of yaks I herd will make it hard for me to support my family.                                                        | 1                     | 2            | 3              | 4               | 5                        | NS               |
| 12. Most people in <b>my herding group</b> have reduced the size of their herd over the last 5 years.                                        | 1                     | 2            | 3              | 4               | 5                        | NS               |
| 13. People in <b>my herding group</b> think it is better for me to have a larger herd.                                                       | 1                     | 2            | 3              | 4               | 5                        | NS               |
| 14. Reducing the number of yaks I herd means I wouldn't have enough Yak products (butter, milk) for my family.                               | 1                     | 2            | 3              | 4               | 5                        | NS               |
| 15. In the last 5 years, people in <b>my herding group</b> have reduced the                                                                  | 1                     | 2            | 3              | 4               | 5                        | NS               |



# CULTURALLY CONTEXTUALIZED COMMUNICATION MEASUREMENT

|                                                                                                   |   |   |   |   |   |    |
|---------------------------------------------------------------------------------------------------|---|---|---|---|---|----|
| number of yaks they herd.                                                                         |   |   |   |   |   |    |
| <b>16.</b> People in <b>my herding group</b> think it is best for me to reduce my herd size.      | 1 | 2 | 3 | 4 | 5 | NS |
| <b>17.</b> I feel close to other people in <b>my herding group</b> .                              | 1 | 2 | 3 | 4 | 5 | NS |
| <b>18.</b> If I reduce the number of yaks I herd, I will no longer feel like a “Tibetan”.         | 1 | 2 | 3 | 4 | 5 | NS |
| <b>19.</b> Over the next 5 years I plan to reduce the number of yaks I herd.                      | 1 | 2 | 3 | 4 | 5 | NS |
| <b>20.</b> If I reduce my herd size, it will improve the quality of the grassland.                | 1 | 2 | 3 | 4 | 5 | NS |
| <b>21.</b> I would do what would please my family, even if I didn’t like doing it.                | 1 | 2 | 3 | 4 | 5 | NS |
| <b>22.</b> I usually sacrifice my self-interest for the benefit of others around me.              | 1 | 2 | 3 | 4 | 5 | NS |
| <b>23.</b> My happiness depends very much on the happiness of those around me.                    | 1 | 2 | 3 | 4 | 5 | NS |
| <b>24.</b> When I think about buying or selling yaks, I follow religious teachings.               | 1 | 2 | 3 | 4 | 5 | NS |
| <b>25.</b> I plan to reduce my herd size in the next 5 years.                                     | 1 | 2 | 3 | 4 | 5 | NS |
| <b>26.</b> It is important for me to maintain harmony with people around me.                      | 1 | 2 | 3 | 4 | 5 | NS |
| <b>27.</b> It is important for me to do what <b>people in my herding group</b> think I should do. | 1 | 2 | 3 | 4 | 5 | NS |
| <b>28.</b> It is important for me to do what the <b>leaders of</b>                                | 1 | 2 | 3 | 4 | 5 | NS |

# CULTURALLY CONTEXTUALIZED COMMUNICATION MEASUREMENT

|                                                                                                                                                 |   |   |   |   |   |    |
|-------------------------------------------------------------------------------------------------------------------------------------------------|---|---|---|---|---|----|
| <b>the herding group</b><br>think I should do.                                                                                                  |   |   |   |   |   |    |
| <b>29.</b> It is important to me<br>what the <b>lamas</b> think<br>we should do.                                                                | 1 | 2 | 3 | 4 | 5 | NS |
| <b>30.</b> I plan to increase the<br>size of my herd in the<br>next 5 years.                                                                    | 1 | 2 | 3 | 4 | 5 | NS |
| <b>31.</b> I think people in <b>my</b><br><b>herding group</b> would<br>be upset with me if I<br>don't reduce the number<br>of animals I graze. | 1 | 2 | 3 | 4 | 5 | NS |
| <b>32.</b> People in <b>my herding</b><br><b>group</b> will be<br>dissatisfied with me if I<br>don't reduce my herd<br>size.                    | 1 | 2 | 3 | 4 | 5 | NS |
| <b>33.</b> People in <b>my herding</b><br><b>group</b> have decreased<br>the number of yaks they<br>herd.                                       | 1 | 2 | 3 | 4 | 5 | NS |

**34.** On the whole, how similar do you think you are to most **people in your herding group,**

|                                  | <b>1</b><br><b>(very</b><br><b>similar)</b> | <b>2</b><br><b>(similar)</b> | <b>3</b><br><b>(neutral)</b> | <b>4</b><br><b>(not very</b><br><b>similar)</b> | <b>5</b><br><b>(Not</b><br><b>similar at</b><br><b>all)</b> | <b>NS</b><br><b>(Not</b><br><b>sure)</b> |
|----------------------------------|---------------------------------------------|------------------------------|------------------------------|-------------------------------------------------|-------------------------------------------------------------|------------------------------------------|
| a. In your<br>values             | 1                                           | 2                            | 3                            | 4                                               | 5                                                           | NS                                       |
| b. In your<br>behaviors          | 1                                           | 2                            | 3                            | 4                                               | 5                                                           | NS                                       |
| c. In your likes<br>and dislikes | 1                                           | 2                            | 3                            | 4                                               | 5                                                           | NS                                       |

## CULTURALLY CONTEXTUALIZED COMMUNICATION MEASUREMENT

### III.ii. Questions for all participants who are NOT part of a herding group

I am going to read a number of statements some of which ask you about **people in your village**. We are asking you to think about people in your village. After each statement, I will ask you to what degree you agree or disagree with the statement. I will use my fingers to represent the agreement or disagreement, with a “1” representing “strongly agree”, and a “5” representing “strongly disagree.” We understand that you might have a lot to say about some of the questions but in the interest of your time please just give us the answers without explaining your answers. We also understand that many of these questions sound similar to each other but there are small differences among them so please listen carefully to what we are asking.

| Questions                                                                                                                                     | 1<br>(strongly agree) | 2<br>(agree) | 3<br>(neutral) | 4<br>(disagree) | 5<br>(strongly disagree) | NS<br>(not sure) |
|-----------------------------------------------------------------------------------------------------------------------------------------------|-----------------------|--------------|----------------|-----------------|--------------------------|------------------|
| 35. I am worried about whether my grassland can support my herd, for example due to wild animals, pikas and bugs, black soil or winter storm. | 1                     | 2            | 3              | 4               | 5                        | NS               |
| 36. I always sell my yaks at places where the price is the highest.                                                                           | 1                     | 2            | 3              | 4               | 5                        | NS               |
| 37. Reducing the number of yaks I herd will make it hard for me to support my family.                                                         | 1                     | 2            | 3              | 4               | 5                        | NS               |
| 38. Most people in my village have reduced the size of their herd over the last 5 years.                                                      | 1                     | 2            | 3              | 4               | 5                        | NS               |
| 39. People in my village think it is better for me to have a larger herd.                                                                     | 1                     | 2            | 3              | 4               | 5                        | NS               |
| 40. Reducing the number of yaks I herd means I wouldn't have enough Yak products (butter, milk) for my family.                                | 1                     | 2            | 3              | 4               | 5                        | NS               |
| 41. In the last 5 years, people in my village have reduced the number of yaks they herd.                                                      | 1                     | 2            | 3              | 4               | 5                        | NS               |

# CULTURALLY CONTEXTUALIZED COMMUNICATION MEASUREMENT

|                                                                                      |   |   |   |   |   |    |
|--------------------------------------------------------------------------------------|---|---|---|---|---|----|
| 42. People in <b>my village</b> think it is best for me to reduce my herd size.      | 1 | 2 | 3 | 4 | 5 | NS |
| 43. I feel close to other people in <b>my village</b> .                              | 1 | 2 | 3 | 4 | 5 | NS |
| 44. If I reduce the number of yaks I herd, I will no longer feel like a “Tibetan”.   | 1 | 2 | 3 | 4 | 5 | NS |
| 45. Over the next 5 years I plan to reduce the number of yaks I herd.                | 1 | 2 | 3 | 4 | 5 | NS |
| 46. If I reduce my herd size, it will improve the quality of the grassland.          | 1 | 2 | 3 | 4 | 5 | NS |
| 47. I would do what would please my family, even if I didn’t like doing it.          | 1 | 2 | 3 | 4 | 5 | NS |
| 48. I usually sacrifice my self-interest for the benefit of others around me.        | 1 | 2 | 3 | 4 | 5 | NS |
| 49. My happiness depends very much on the happiness of those around me.              | 1 | 2 | 3 | 4 | 5 | NS |
| 50. When I think about buying or selling yaks, I follow religious teachings.         | 1 | 2 | 3 | 4 | 5 | NS |
| 51. I plan to reduce my herd size in the next 5 years.                               | 1 | 2 | 3 | 4 | 5 | NS |
| 52. It is important for me to maintain harmony with people around me.                | 1 | 2 | 3 | 4 | 5 | NS |
| 53. It is important for me to do what <b>people in my village</b> think I should do. | 1 | 2 | 3 | 4 | 5 | NS |
| 54. It is important for me to do what the <b>village leaders</b> think I should do.  | 1 | 2 | 3 | 4 | 5 | NS |
| 55. It is important to me what the <b>lamas</b> think we should do.                  | 1 | 2 | 3 | 4 | 5 | NS |

# CULTURALLY CONTEXTUALIZED COMMUNICATION MEASUREMENT

|                                                                                                                        |   |   |   |   |   |    |
|------------------------------------------------------------------------------------------------------------------------|---|---|---|---|---|----|
| <b>56.</b> I plan to increase the size of my herd in the next 5 years.                                                 | 1 | 2 | 3 | 4 | 5 | NS |
| <b>57.</b> I think people in my <b>village</b> would be upset with me if I don't reduce the number of animals I graze. | 1 | 2 | 3 | 4 | 5 | NS |
| <b>58.</b> People in my <b>village</b> will be dissatisfied with me if I don't reduce my herd size.                    | 1 | 2 | 3 | 4 | 5 | NS |
| <b>59.</b> People in my <b>village</b> have decreased the number of yaks they herd.                                    | 1 | 2 | 3 | 4 | 5 | NS |

**60.** On the whole, how similar do you think you are to most **people in your village,**

|                               | <b>1<br/>(very<br/>similar)</b> | <b>2<br/>(similar)</b> | <b>3<br/>(neutral)</b> | <b>4<br/>(not very<br/>similar)</b> | <b>5<br/>(Not<br/>similar at<br/>all)</b> | <b>NS<br/>(Not<br/>sure)</b> |
|-------------------------------|---------------------------------|------------------------|------------------------|-------------------------------------|-------------------------------------------|------------------------------|
| d. In your values             | 1                               | 2                      | 3                      | 4                                   | 5                                         | NS                           |
| e. In your behaviors          | 1                               | 2                      | 3                      | 4                                   | 5                                         | NS                           |
| f. In your likes and dislikes | 1                               | 2                      | 3                      | 4                                   | 5                                         | NS                           |

## Survey Items in Tibetan (Administered for data collection)

ཕུགས་ཐོག་འཆོལ་ཕགས་སྐྱོར་གྱི་དུས་

དེ་པའི་ཨང་རྟགས་ \_\_\_\_\_ དེ་པ་འདོན་མཁན་གྱི་ཨང་རྟགས་ \_\_\_\_\_ རོགས་སྐྱབ་པའི་ཨང་རྟགས་ \_\_\_\_\_

མ་ཚེས་ \_\_\_\_\_ ས་གནས་ \_\_\_\_\_ བྱ་འགུལ་ལམ་དུས་ཚིན། \_\_\_\_\_

དེ་པ་འདི་འགོ་རྩམ་པའི་དུས་ཚིན་: \_\_\_\_\_ དེ་པ་མཐུག་རྒྱུ་པའི་དུས་ཚིན་ \_\_\_\_\_

## I. རོ་སྦྱོང་མཚམས་སྦྱོར།

## 1. དེ་པ་འདི་མཁན་པོ་ལམ་མོ། [སྐྱོར་རྟགས་རྒྱུ་]

|     |   |
|-----|---|
| ཕྱ། | 1 |
| མོ། | 2 |

རང་ཉིད་རོ་སྦྱོང་། ང་འི་རྒྱ་རང་བྱུང་སྦྱོར་རྒྱུ་གནས་ཀྱི་ཡིན། ང་ཚོས་ལུས་ཤུལ་ས་ཁུལ་གྱི་ཕུགས་ཐོག་འཆོལ་ཕགས་སྐྱོར་ལ་ཞིབ་འཇུག་བྱེད་ཀྱིན་ཡོད། དེའི་དམིགས་ལུས་ནི་ས་གནས་ཀྱི་སྤྱོད་ལམས་དང་མིའི་འཆོ་བ་མེ་བཟང་དུ་གཏོང་བའི་ཐབས་ལམ་བཅས་པ་ཡིན། ང་ཚོས་ཁྱོད་ཀྱི་ཕུགས་ཐོག་འཆོལ་ཕགས་སྐྱོར་གྱི་བསམ་ཚུལ་ཤེས་འདོད། དེའི་ཕྱིར་ཁྱོད་ལ་དེ་པ་འགའ་འདི་རྒྱ་ཡོད། དེ་པ་འདི་དག་ལན་བཏབ་ན་ཕལ་ཆེར་སྐར་མ་30 དཔོན། དེ་པ་དེས་ཚར་རྒྱུ་ལ་ལགས་སྤྱོད་རྒྱུ་ཆུང་ཆུང་ཞིག་ཉེས། བཀའ་དྲིན་ཆེ།

## 2. ཁྱོད་རང་འཕྲོག་པ་ཡིན་ནམ། [དེས་ལན་ལ་སྐྱོར་རྟགས་རྒྱུ་]

|      |   |
|------|---|
| ཡིན། | 1 |
| མིན། | 2 |

→ གཤམ་གྱི་དེ་པ་དེས།

→ དེ་པ་7 དེས།

## 3. ཁྱོད་ཚང་ལ་ཁོར་10 ཡི་ཡན་ཡོད་དམ། [དེས་ལན་ལ་སྐྱོར་རྟགས་རྒྱུ་]

|      |   |
|------|---|
| ཡོད། | 1 |
| མེད། | 2 |

→ གཤམ་གྱི་དེ་པ་དེས།

→ དེ་པ་7 དེས།

## 4. ཁྱོད་རང་ཁྱི་ཚང་གི་ཁྱི་བདག་ཡིན་ནམ། [དེས་ལན་ལ་སྐྱོར་རྟགས་རྒྱུ་]

|      |   |
|------|---|
| ཡིན། | 1 |
| མིན། | 2 |

→ གཤམ་གྱི་དེ་པ་དེས།

→ དེ་པ་7 དེས།

## 5. ངས་ཁྱོད་ལ་ང་ཚོས་དེ་པ་སྐྱོར་གྱི་གནས་ཚུལ་བཤད། དེ་རྒྱུ་ཁྱོད་ཀྱིས་ཐུ་མཐུད་དུ་ལན་འདེབས་མིན་ཐག་གཅོད། [དེས་ལན་ལ་སྐྱོར་རྟགས་རྒྱུ་]

|         |   |
|---------|---|
| ཚོག་གི། | 1 |
|---------|---|

→ ཚོག་མཚན་གོ་རིམ་ཤོད།

|             |   |                 |
|-------------|---|-----------------|
| མི་ཚོགས་གི་ | 2 | → དྲི་བ་7 དྲིས། |
|-------------|---|-----------------|

[སྐབས་འདིར་ཚོགས་མཆན་གོ་རེས་ཤོད།]

6. བྱོན་གྱིས་དྲི་བ་འདི་དག་ལན་འདེབས་འདོད་དམ། [དྲིས་ལན་ལ་སྒྲོར་རྟགས་རྒྱུ་]

[དྲི་བ་འདི་མཁན་གྱིས་མཉམ་འཛིན་བྱ་རྒྱུ། དྲི་ལན་འདེབས་མཁན་གྱིས་ ཉངས་ལེན་འདེབས་འདོད། འོན་ཀྱང་ང་ལ་ཤེས་ཡོན་མེད་པས་ངས་ལེན་འདེབས་ཐུབ་རྒྱུ་མ་རེད། ཁེར་དུས་2ལ་སྒྲོར་རྟགས་བརྒྱབ་ནས་དྲི་བ་དོན་ཚན་ II པ་དྲིས།]

|                                                                            |   |                          |
|----------------------------------------------------------------------------|---|--------------------------|
| ལན་འདེབས་འདོད།                                                             | 1 | → དོན་ཚན་ II པ་<br>དྲིས། |
| ངས་ལེན་འདེབས་འདོད། འོན་ཀྱང་ང་ལ་ཤེས་ཡོན་མེད་པས་ངས་ལེན་འདེབས་ཐུབ་རྒྱུ་མ་རེད། | 2 | → དོན་ཚན་ II པ་<br>དྲིས། |
| ངས་ལེན་འདེབས་མི་འདོད།                                                      | 3 | → དྲི་བ་7 དྲིས།          |

7. བཀའ་དྲིན་ཆེ། མཐའ་མཐུག་གི་དྲི་བ་འགའ་དྲིས་ན་ཚོགས་གམ།

a. བྱོན་པ་ལྟལ་གང་ན་ཡོད།

ཞང་ \_\_\_\_\_; ཟླ་བ་ \_\_\_\_\_.

b. བྱོན་རང་ལ་དུ་ཡིན། \_\_\_\_\_

d. གཤམ་ཏེ་དྲིས་ལན་འདེབས་མཁན་གྱིས་ a དང་ b གཉིས་ལན་མ་བཏབ་ན་འདི་ལ་རྟགས་རྒྱུ་ \_\_\_\_\_

[བཀའ་དྲིན་ཆེ་ལྟ་རྒྱུས་འདི་མཆན་མས་ཞོག།]

II. ལྷགས་ཐོག་འཚོ་ལྷགས་སྒྲོར་གྱི་གནས་ཚུལ།

8. བྱོན་རང་གིས་དུ་ཆང་གཞན་དང་མཉམ་དུ་ཆུང་གཅིག་གི་ནང་དུ་ལྷགས་ཐོག་འཚོ་བ་ཡིན་ནམ། [དྲིས་ལན་ལ་སྒྲོར་རྟགས་རྒྱུ་]

|      |   |                                                                                                                               |
|------|---|-------------------------------------------------------------------------------------------------------------------------------|
| ཡིན། | 1 | → གཤམ་གྱི་དྲི་བ་(a)-(b) དྲིས། དེའི་རྒྱུས་དོན་ཚན་ III.i. དྲིས། (དྲི་བ་9-35) དེའི་རྒྱུས་དོན་ཚན་ IV དྲིས། དོན་ཚན་ III.ii མ་འདྲི། |
| མིན། | 2 | → དོན་ཚན་ III.ii .(དྲི་བ་36-62) དང་དོན་ཚན་ IV དྲིས། དོན་ཚན་ III.i མ་འདྲི།                                                     |

a. བྱོན་གྱིས་དུ་ཆང་གཞན་དང་མཉམ་དུ་ཐོག་འཚོ་བ་ཡིན།

དུ་ཆང་ \_\_\_\_\_

b. བྱོན་རང་ལྷགས་ཐོག་འཚོ་བའི་ཆུང་འདིའི་འགོ་བྱོན་ཡིན་ནམ། (ཐོན་ཆང་འགོ་བྱོན་ཡིན་པ་ནང་དུ་གཏོགས། ད་ལྟ་འགོ་བྱོན་མེན་པ་དག་གིས་“མེན”འདེམས།)

ཡིན། \_\_\_\_\_ མིན། \_\_\_\_\_

III. རྒྱུན་ཤེས་ཚད་གཞི་སྒྲོར་གྱི་དྲི་བ།

### III.i. སྤྱི་བ་ལན་འདེབས་མཐུན་ཡོངས་ལ།

ངས་འདི་ནས་ཁྱེད་ཚོའི་ཆོ་རྒྱུ་ནང་གི་མི་རྒྱལ་དང་འབྲེལ་བའི་གཏན་ཚིགས་འགའ་འདོན་རྒྱུ་ཡིན། ཁྱེད་ཀྱི་ཆོ་རྒྱུ་ལས་ཟླ་མི་གཞན་གྱི་གཏན་ཚིགས་ལྟོག་  
 རྒྱུ་ངས་ཁྱེད་རང་གཏན་ཚིགས་དེ་ལ་འཐད་མིན་གྱི་ཚད་ཅི་འདྲ་ཡིན་པ་འདྲི་རྒྱུ་ཡིན། ངས་རང་གི་མཛུབ་མོ་བཀོལ་ནས་ཁྱེད་རང་འཐད་མིན་འདྲི་རྒྱུ་ཡིན། 1  
 གིས་ཤིན་ཏུ་འཐད་པ་མཚོན། 5ཡིས་ཤིན་ཏུ་མི་འཐད་པ་མཚོན། རྒྱལ་ཚོད་ཀྱི་དབང་གིས་ང་ཚོར་འཐད་མིན་གྱི་ཚད་བཤད་ན་ཚོག་འབྲེལ་བཤད་རྒྱལ་མི་དགོས།  
 སྤྱི་མ་ལ་ལ་ཕན་ཚུན་དང་འདྲ་པོ་འདུག་འོན་ཀྱང་ཕན་ཚུན་ལ་ཁྱེད་པར་ཡོད། དེའི་ཕྱིར་ཁྱེད་ཀྱིས་ཉན་རོགས།

| སྤྱི་བ།                                                                                                                      | 1<br>ཤིན་ཏུ་མི་<br>འཐད་པ | 2<br>མི་འཐད་པ | 3<br>འཐད་མིན་<br>འདྲ་འདྲ | 4<br>འཐད་པ | 5<br>ཤིན་ཏུ་འཐད་<br>པ | ངས་གསལ་<br>བོར་མི་ཤིས། |
|------------------------------------------------------------------------------------------------------------------------------|--------------------------|---------------|--------------------------|------------|-----------------------|------------------------|
| 9. རི་རྒྱུས་ཕྱོག་ཆགས་དང་མ་བྲ། འཕྲུལ་གྱི་ས་<br>ནག་གཤམ་རྒྱུན་སྒྲིལ་གྱི་ཁྱེད་ཀྱིས་ངའི་རང་གི་<br>ཕ་ས་ཕྱགས་ཐོག་ལ་འདྲང་མིན་མི་ཤིས། | 1                        | 2             | 3                        | 4          | 5                     | NS                     |
| 10. ངས་ནས་ཡང་རིན་གོང་མཐོ་མའི་ཆོང་རར་ཐོག་<br>བཞོང་བ་ཡིན།                                                                      | 1                        | 2             | 3                        | 4          | 5                     | NS                     |
| 11. ངས་རང་གི་ཕྱགས་ཐོག་མེ་ཉུང་དུ་བཏང་ན་ཁྱིམ་<br>ཆང་གི་འཆོ་བ་རྒྱུང་དཀའ་རྒྱ་ཤིང་།                                               | 1                        | 2             | 3                        | 4          | 5                     | NS                     |
| 12. ང་ཚོ་ཆོ་རྒྱུ་ནང་གི་མི་མང་ཤོས་འདས་ཐེན་<br>པའི་ལོ་1ནང་ཕྱགས་ཐོག་མེ་ཉུང་དུ་བཏང་ཐེན།                                          | 1                        | 2             | 3                        | 4          | 5                     | NS                     |
| 13. ང་ཚོ་ཆོ་རྒྱུ་ནང་གི་མི་ཆང་མས་ང་རང་ལ་<br>ཕྱགས་ཐོག་མེ་ཉུང་ལ་བཏང་ན་ང་རང་ལ་མར་<br>དང་འོ་མ་སྒྲིལ་འདྲང་པོ་ཡོད་རྒྱུ་མ་ཤིང་།      | 1                        | 2             | 3                        | 4          | 5                     | NS                     |
| 14. ཕྱགས་ཐོག་མེ་ཉུང་ལ་བཏང་ན་ང་རང་ལ་མར་<br>དང་འོ་མ་སྒྲིལ་འདྲང་པོ་ཡོད་རྒྱུ་མ་ཤིང་།                                             | 1                        | 2             | 3                        | 4          | 5                     | NS                     |
| 15. འདས་ཐེན་པའི་ལོ་1ནང་ང་ཚོ་ཆོ་རྒྱུ་ནང་གི་<br>མི་ཆོས་ཕྱགས་ཐོག་མེ་ཉུང་དུ་བཏང་ཐེན།                                             | 1                        | 2             | 3                        | 4          | 5                     | NS                     |
| 16. ང་ཚོ་ཆོ་རྒྱུ་ནང་གི་མི་ཆང་མས་ང་རང་ལ་<br>ཕྱགས་ཐོག་མེ་ཉུང་དུ་བཏང་ན་བཟང་རྒྱ་ཤིང་<br>བསམ།                                     | 1                        | 2             | 3                        | 4          | 5                     | NS                     |
| 17. ངས་ང་རང་ཆོ་རྒྱུ་ནང་གི་མི་རྒྱལ་དང་<br>འབྲེལ་བ་ཡག་པོ་འཕྲེལ་བསམ།                                                            | 1                        | 2             | 3                        | 4          | 5                     | NS                     |
| 18. གལ་ཏེ་ངས་ཕྱོག་མེ་ཉུང་དུ་བཏང་ན། ང་པོད་མི་<br>ཞིག་ཡིན་པའི་ཆོར་བ་མེད།                                                       | 1                        | 2             | 3                        | 4          | 5                     | NS                     |
| 19. མ་འོངས་པའི་ལོ་1ནང་ང་རང་ལ་ཕྱགས་ཐོག་མེ་<br>ཉུང་དུ་གཏོང་བའི་འཆར་གཞི་ཡོད།                                                    | 1                        | 2             | 3                        | 4          | 5                     | NS                     |
| 20. གལ་ཏེ་ངས་ཕྱགས་ཐོག་མེ་ཉུང་དུ་བཏང་ན་ཕ་<br>ས་མེ་བཟང་དུ་འགྲོ་རྒྱུ་ཤིང་།                                                      | 1                        | 2             | 3                        | 4          | 5                     | NS                     |
| 21. ངས་རང་གི་ཁྱིམ་མི་ཆོད་གཤམ་པའི་བྱ་བ་ཅི་ཡང་<br>ལས་བསམ། ང་རང་ཉིད་དེ་ལ་མི་དགའ་ན་ཡང་<br>ལས་བསམ།                                | 1                        | 2             | 3                        | 4          | 5                     | NS                     |
| 22. ངས་རང་དྲང་ཉེ་པའི་མི་ཡི་ཆེད་དུ་རང་གི་<br>འདོད་མོ་རྒྱུ་གཏོང་ཡོད།                                                           | 1                        | 2             | 3                        | 4          | 5                     | NS                     |



# CULTURALLY CONTEXTUALIZED COMMUNICATION MEASUREMENT

|                                                                                    |   |   |   |   |   |    |
|------------------------------------------------------------------------------------|---|---|---|---|---|----|
| 23. ངའི་བདེ་སྲོད་དང་ཉེ་བའི་མི་འདི་དག་ལ་<br>ཉེན་ཡོད།                                | 1 | 2 | 3 | 4 | 5 | NS |
| 24. ཕྱགས་ཐོག་ཉོ་འཛོལ་བྱེད་དུས་ངས་རྒྱན་དུ་ཚོས་<br>ཁྱིམ་ཁྱུང་བ་ཡིན།                  | 1 | 2 | 3 | 4 | 5 | NS |
| 25. མ་འོངས་པའི་ཁོ་ཉོན་དང་ཕྱགས་ཐོག་ཤེ་<br>ཉུང་དུ་གཏོང་གྱུ།                          | 1 | 2 | 3 | 4 | 5 | NS |
| 26. ང་ཉེ་བའི་མི་དང་འགྲིག་མཐུན་རྒྱུ་དང་རང་<br>ལ་མཚོན་ན་གཤམ་ཆེ།                      | 1 | 2 | 3 | 4 | 5 | NS |
| 27. རང་གི་ཚོ་རྒྱུད་ནང་གི་མི་ཚང་མས་བསམ་ཚུལ་<br>དང་བསྟན་རྒྱུ་དང་ལ་མཚོན་ན་གཤམ་ཆེ།     | 1 | 2 | 3 | 4 | 5 | NS |
| 28. རང་གི་ཚོ་རྒྱུད་འགོ་ཁྱིམ་སྐོར་ཚུལ་དང་<br>བསྟན་རྒྱུ་དང་ལ་མཚོན་ན་གཤམ་ཆེ།          | 1 | 2 | 3 | 4 | 5 | NS |
| 29. ཁྱ་མའི་བསམ་ཚུལ་དང་བསྟན་རྒྱུ་དང་ཚོར་<br>མཚོན་ན་གཤམ་ཆེ།                          | 1 | 2 | 3 | 4 | 5 | NS |
| 30. མ་འོངས་པའི་ཁོ་ཉོན་དང་ཕྱགས་ཐོག་ཤེ་མང་<br>དུ་གཏོང་བའི་འཆར་གཞི་ཡོད།               | 1 | 2 | 3 | 4 | 5 | NS |
| 31. གཤམ་ཉེ་དང་ཕྱགས་ཐོག་ཤེ་ཉུང་དུ་མ་བཏང་ན་<br>ཚོ་རྒྱུད་ནང་གི་མི་ཚང་མ་ཁྱིམ་ཁྱུང་འདྲ། | 1 | 2 | 3 | 4 | 5 | NS |
| 32. གཤམ་ཉེ་དང་ཕྱགས་ཐོག་ཤེ་ཉུང་དུ་མ་བཏང་ན་<br>ཕྱི་བ་ནང་གི་མི་ཚང་མི་དག་འདྲ་མ་འདྲ།    | 1 | 2 | 3 | 4 | 5 | NS |
| 33. ང་ཚོ་ཚོ་རྒྱུད་ནང་གི་མི་རྣམས་ཀྱིས་ཕྱགས་ཐོག་<br>ཤེ་ཉུང་དུ་བཏང་ཟིན།               | 1 | 2 | 3 | 4 | 5 | NS |

## 34. ཁྱོད་རང་ཉིད་དང་ཁྱོད་ཚོ་ཚོ་རྒྱུད་ནང་གི་མི་རྣམས་འདྲ་བ་འདྲ་དམ།

|                                 | 1<br>གཏན་ནས་མི་འདྲ་བ | 2<br>མི་འདྲ་བ | 3<br>འདྲ་མི་འདྲ་བར་མ་<br>འདྲ། | 4<br>འདྲ་བ། | 5<br>ཉོན་ཅང་འདྲ་བ། | NS<br>མི་ཤེས། |
|---------------------------------|----------------------|---------------|-------------------------------|-------------|--------------------|---------------|
| g. རིན་ཐང་ལྟ་བུ་                | 1                    | 2             | 3                             | 4           | 5                  | NS            |
| h. བྱ་སྒྱུད་                    | 1                    | 2             | 3                             | 4           | 5                  | NS            |
| i. དགའ་ཕྱགས་དང་མི་<br>དགའ་ཕྱགས་ | 1                    | 2             | 3                             | 4           | 5                  | NS            |

## III.ii. ཇི་བའདི་ཚོ་ཕྱགས་ཐོག་ཚོ་རྒྱུ་ནང་དུ་འཚོ་བའི་འཕྲོག་པ་རྒྱུ་རྒྱུ་ལ་དྲིས།

ངས་ཁྱེད་ལ་གོང་གི་དྲི་བ་དང་འདྲ་བའི་དྲི་བ་འགའ་འདྲི་རྒྱུ་ཡིན། འོན་ཀྱང་ད་ཐེངས་ཁྱེད་ཀྱི་ཕྱགས་ཐོག་འཚོ་བའི་ཐེ་བ་ནང་གི་སྐོར་ཡིན་པ་ལས་ཁྱེད་ཚོ་ཚོ་  
རྒྱུ་གི་དུ་ཚད་གཞན་མིན། དྲི་བ་ལན་འདེབས་དུས་ཁྱེད་ཀྱི་ཕྱགས་ཐོག་འཚོ་བའི་ཐེ་མི་སེམས་ལ་བབས། 1 གིས་ཤིན་ཏུ་འཐད་པ་མཚོན། 5ཡིས་ཤིན་ཏུ་མི་  
འཐད་པ་མཚོན། དུས་ཚོད་ཀྱི་དབང་གིས་ང་ཚོར་འཐད་མིན་གྱི་ཚད་བཤད་ན་ཚོག་འགྲེལ་བཤད་རྒྱག་མི་དགོས། དྲི་མ་ལ་ལ་ཕན་ཚུན་དང་འདྲ་བའི་འདུག་འོན་  
ཀྱང་ཕན་ཚུན་ལ་ཁྱེད་པར་ཡོད། དེའི་ཕྱིར་ཁྱེད་ཀྱིས་ཉན་རོགས།

| དྲི་ག                                                                                                                         | 1<br>ཤིན་ཏུ་མི་<br>འཐད་པ | 2<br>མི་འཐད་པ | 3<br>འཐད་མིན་<br>འདྲ་འདྲ | 4<br>འཐད་པ | 5<br>ཤིན་ཏུ་འཐད་པ | ངས་<br>གསལ་<br>པོར་མི་<br>ཤིས། |
|-------------------------------------------------------------------------------------------------------------------------------|--------------------------|---------------|--------------------------|------------|-------------------|--------------------------------|
| 35. ཇི་སྐྱེས་ཐོག་ཆགས་དང་མ་བྲ། འབྲ་ནག་ས་<br>ནག་གངས་སྐྱོན་སོགས་ཀྱི་སྐྱེན་གྱིས་ངའི་<br>རང་གི་ལྷ་ས་ཕྱགས་ཐོག་ལ་འདང་མིན་མི་<br>ཤིས། | 1                        | 2             | 3                        | 4          | 5                 | NS                             |
| 36. ངས་ནམ་ཡང་རིན་གོང་མཐོ་སའི་ཚོང་རར་<br>ཐོག་བཞོང་བ་ཡིན།                                                                       | 1                        | 2             | 3                        | 4          | 5                 | NS                             |
| 37. ངས་རང་གི་ཕྱགས་ཐོག་ཇི་ཉུང་དུ་བཏང་ན་<br>ཁྱིམ་ཚང་གི་འཚོ་བ་སྐྱོང་དཀའ་རྒྱ་རེད།                                                 | 1                        | 2             | 3                        | 4          | 5                 | NS                             |
| 38. ང་ཚོ་ཐེ་བ་ནང་གི་མི་མང་ཤོས་འདས་ཐེན་<br>བའི་ལོ་1ནང་ཕྱགས་ཐོག་ཇི་ཉུང་དུ་བཏང་<br>ཐེན།                                          | 1                        | 2             | 3                        | 4          | 5                 | NS                             |
| 39. ང་ཚོ་ཐེ་བ་ནང་གི་མི་ཚང་མས་ང་རང་ལ་<br>ཕྱགས་ཐོག་ཇི་མང་ཡིན་ན་བཟང་རྒྱ་རེད་<br>བསམ།                                             | 1                        | 2             | 3                        | 4          | 5                 | NS                             |
| 40. ཕྱགས་ཐོག་ཇི་ཉུང་ལ་བཏང་ན་ང་རང་ལ་<br>མར་དང་འོ་མ་སོགས་འདང་པོ་ཡོད་རྒྱ་མ་<br>རེད།                                              | 1                        | 2             | 3                        | 4          | 5                 | NS                             |
| 41. འདས་ཐེན་བའི་ལོ་1ནང་ང་ཚོ་ཐེ་བ་ནང་གི་<br>ཐེ་མི་ཚོས་ཕྱགས་ཐོག་ཇི་ཉུང་དུ་བཏང་ཐེན།                                              | 1                        | 2             | 3                        | 4          | 5                 | NS                             |
| 42. ང་ཚོ་ཐེ་བ་ནང་གི་མི་ཚང་མས་ང་རང་ལ་<br>ཕྱགས་ཐོག་ཇི་ཉུང་དུ་བཏང་ན་བཟང་རྒྱ་<br>རེད་བསམ།                                         | 1                        | 2             | 3                        | 4          | 5                 | NS                             |
| 43. ངས་ང་རང་ཐེ་བ་ནང་གི་ཐེ་མི་དང་འབྲེལ་<br>བ་ཡག་པོ་འཕུ་ཉེ་པོ་ཡོད་བསམ།                                                          | 1                        | 2             | 3                        | 4          | 5                 | NS                             |
| 44. གལ་ཏེ་ངས་ཐོག་ཇི་ཉུང་དུ་བཏང་ན། ང་<br>པོད་མི་ཞིག་ཡིན་པའི་ཚོར་བ་མེད།                                                         | 1                        | 2             | 3                        | 4          | 5                 | NS                             |
| 45. མ་འོངས་བའི་ལོ་1ནང་ང་རང་ལ་ཕྱགས་<br>ཐོག་ཇི་ཉུང་དུ་གཏོང་བའི་འཆར་གཞི་ཡོད།                                                     | 1                        | 2             | 3                        | 4          | 5                 | NS                             |
| 46. གལ་ཏེ་ངས་ཕྱགས་ཐོག་ཇི་ཉུང་དུ་བཏང་ན་<br>ལྷ་ས་ཇི་བཟང་དུ་འགྲོ་རྒྱ་རེད།                                                        | 1                        | 2             | 3                        | 4          | 5                 | NS                             |
| 47. ངས་རང་གི་ཁྱིམ་མི་ཚོ་དགའ་བའི་བྱ་བ་ཅི་<br>ཡང་ལས་བསམ། ང་རང་ཉིད་དེ་ལ་མི་དགའ་<br>ན་ཡང་ལས་བསམ།                                  | 1                        | 2             | 3                        | 4          | 5                 | NS                             |

# CULTURALLY CONTEXTUALIZED COMMUNICATION MEASUREMENT

|                                                                                |   |   |   |   |   |    |
|--------------------------------------------------------------------------------|---|---|---|---|---|----|
| 48. ངས་རང་དང་ཉེ་བའི་མི་ཡི་ཆེད་དུ་རང་གི་<br>འདོད་ཆོ་རྒྱལ་གཏོང་ཡོད།              | 1 | 2 | 3 | 4 | 5 | NS |
| 49. ངའི་བདེ་སྲོད་དང་ཉེ་བའི་མི་འདི་དག་ལ་<br>རྟོན་ཡོད།                           | 1 | 2 | 3 | 4 | 5 | NS |
| 50. ལྷགས་ཚོག་ཉི་འཛོང་བྱེད་དུས་ངས་རྒྱན་དུ་<br>ཆོས་ཁྲིམས་སྲུང་བ་ཡིན།             | 1 | 2 | 3 | 4 | 5 | NS |
| 51. མ་འོངས་པའི་ལོ་ཉང་དུ་ངས་ལྷགས་ཚོག་<br>ཇི་ཉེ་དུ་གཏོང་རྒྱ།                     | 1 | 2 | 3 | 4 | 5 | NS |
| 52. ང་ཉེ་བའི་མི་དང་འགྲིག་མཐུན་བྱུང་རྒྱ་<br>རང་ལ་མཆོད་ན་གཤམ་ཆེ།                 | 1 | 2 | 3 | 4 | 5 | NS |
| 53. རང་གི་ཐེ་བ་ནང་གི་ཐེ་མའི་བསམ་ཚུལ་དང་<br>བསྐྱེད་རྒྱུ་རང་ལ་མཆོད་ན་གཤམ་ཆེ།     | 1 | 2 | 3 | 4 | 5 | NS |
| 54. རང་གི་ཐེ་བའི་འགོ་བློ་ཀྱི་བསམ་ཚུལ་དང་<br>བསྐྱེད་རྒྱུ་རང་ལ་མཆོད་ན་གཤམ་ཆེ།    | 1 | 2 | 3 | 4 | 5 | NS |
| 55. རྒྱ་མའི་བསམ་ཚུལ་དང་བསྐྱེད་རྒྱུ་རང་ཆོར་<br>མཆོད་ན་གཤམ་ཆེ།                   | 1 | 2 | 3 | 4 | 5 | NS |
| 56. མ་འོངས་པའི་ལོ་ཉང་དུ་ངས་ལྷགས་ཚོག་ཇི་<br>མང་དུ་གཏོང་བའི་འཆར་གཞི་ཡོད།         | 1 | 2 | 3 | 4 | 5 | NS |
| 57. གཤམ་ཉེ་ངས་ལྷགས་ཚོག་ཇི་ཉེ་དུ་མ་བཏང་<br>ན་ཐེ་བ་ནང་གི་མི་ཆང་མ་ཁྲི་རྒྱ་ཡོད།    | 1 | 2 | 3 | 4 | 5 | NS |
| 58. གཤམ་ཉེ་ངས་ལྷགས་ཚོག་ཇི་ཉེ་དུ་མ་བཏང་<br>ན་ཐེ་བ་ནང་གི་མི་ཆང་མི་དགའ་རྒྱ་མ་ཡོད། | 1 | 2 | 3 | 4 | 5 | NS |
| 59. ང་ཆོ་ཐེ་བའི་ཐེ་མི་རྣམས་ཀྱིས་ལྷགས་ཚོག་ཇི་<br>ཉེ་དུ་བཏང་བྱེད།                | 1 | 2 | 3 | 4 | 5 | NS |

## 60. བྱོད་རང་ཉིད་དང་བྱོད་ཆོ་ཐེ་བ་ནང་གི་ཐེ་མི་རྣམས་འདྲ་བ་ལེད་དམ།

|                                  | 1<br>གཏན་ནས་མི་འདྲ་བ | 2<br>མི་འདྲ་བ | 3<br>འདྲ་མི་འདྲ་བར་མ་<br>ཤིང། | 4<br>འདྲ་བ། | 5<br>ཉེ་ཆང་འདྲ་བ། | NS<br>མི་ཤིས། |
|----------------------------------|----------------------|---------------|-------------------------------|-------------|-------------------|---------------|
| a. རིན་ཐང་རྩ་བ                   | 1                    | 2             | 3                             | 4           | 5                 | NS            |
| b. བྱ་སྦྱོད                      | 1                    | 2             | 3                             | 4           | 5                 | NS            |
| c. དགའ་ཕྱོགས་དང་མི་<br>དགའ་ཕྱོགས | 1                    | 2             | 3                             | 4           | 5                 | NS            |
